# Supplementary material
Source: publisher site journal article supplement (https://www.dovepress.com/article/418387)
Supplement: Supplementary file 1 [file get_supplementary_file.php]

**Supplement 1**

**Images of 48 patients provide additional information about the assessment of tumor response.**

**Note: Tumor response of intrahepatic lesions is based on RECIST and mRECIST, respectively.**

Figure 1S:Patient 1 achieved partial in intrahepatic lesions under both RECIST and mRECIST criteria.

Figure 2S:Patient 2achieved partial in intrahepatic lesions under both RECIST and mRECIST criteria.

Figure 3S:Patient 3 achieved partial in intrahepatic lesions under both RECIST and mRECIST criteria.

Figure 4S:Patient 4 achieved partial in intrahepatic lesions under both RECIST and mRECIST criteria.

Figure 5S:Patient 5 achieved partial in intrahepatic lesions under both RECIST and mRECIST criteria.

Figure 6S:Patient 6 achieved partial in intrahepatic lesions under both RECIST and mRECIST criteria.

Figure 7S:Patient 7 achieved partial in intrahepatic lesions under both RECIST and mRECIST criteria.

Figure 8S:Patient 8 achieved partial in intrahepatic lesions under both RECIST and mRECIST criteria.

Figure 9S:Patient 9 achieved partial in intrahepatic lesions under both RECIST and mRECIST criteria.

Figure 10S:Patient 10 achieved partial in intrahepatic lesions under both RECIST and mRECIST criteria.

Figure 11S:Patient 11 achieved partial in intrahepatic lesions under both RECIST and mRECIST criteria.

Figure 12S:Patient 12 achieved partial in intrahepatic lesions under both RECIST and mRECIST criteria.

Figure 13S:Patient 13 achieved partial in intrahepatic lesions under both RECIST and mRECIST criteria.

Figure 14S:Patient 14 achieved partial in intrahepatic lesions under both RECIST and mRECIST criteria.

Figure 15S:Patient 15 achieved partial in intrahepatic lesions under both RECIST and mRECIST criteria.

Figure 16S:Patient 16 achieved partial in intrahepatic lesions under both RECIST and mRECIST criteria.

Figure 17S:Patient 17 achieved partial in intrahepatic lesions under both RECIST and mRECIST criteria.

Figure 18S:Patient 18 achieved partial in intrahepatic lesions under both RECIST and mRECIST criteria.

Figure 19S:Patient 19 achieved partial in intrahepatic lesions under both RECIST and mRECIST criteria.

Figure 20S:Patient 20 achieved partial in intrahepatic lesions under both RECIST and mRECIST criteria.

Figure 21S:Patient 21 achieved partial in intrahepatic lesions under both RECIST and mRECIST criteria.

Figure 22S:Patient 22 achieved partial in intrahepatic lesions under both RECIST and mRECIST criteria.

Figure 23S:Patient 23 achieved partial in intrahepatic lesions under both RECIST and mRECIST criteria.

Figure 24S:Patient 24 achieved partial response (RECIST) and partial response (mRECIST) ofintrahepatic lesions.

Figure 25S:achieved partial in intrahepatic lesions under both RECIST and mRECIST criteria.

Figure 26S:Patient 26 achieved partial in intrahepatic lesions under both RECIST and mRECIST criteria.

Figure 27S:Patient 27 achieved partial in intrahepatic lesions under both RECIST and mRECIST criteria.

Figure 28S:Patient 28 achieved partial in intrahepatic lesions under both RECIST and mRECIST criteria.

Figure 29S:Patient 29 achieved partial in intrahepatic lesions under both RECIST and mRECIST criteria.

Figure 30S:Patient 30 achieved partial in intrahepatic lesions under both RECIST and mRECIST criteria.

Figure 31 S:Patient 31 achieved partial in intrahepatic lesions under both RECIST and mRECIST criteria.

Figure 32S:Patient 32 achieved partial in intrahepatic lesions under both RECIST and mRECIST criteria.

Figure 33S:Patient 33 achieved partial in intrahepatic lesions under both RECIST and mRECIST criteria.

Figure 34S:Patient 34 achieved partial in intrahepatic lesions under both RECIST and mRECIST criteria.

Figure 35S:Patient 35 achieved partial in intrahepatic lesions under both RECIST and mRECIST criteria.

Figure 36S:Patient 36 achieved partial in intrahepatic lesions under both RECIST and mRECIST criteria.

Figure 37S:Patient 36 achieved partial in intrahepatic lesions under both RECIST and mRECIST criteria.

Figure 38S:Patient 38 achieved partial in intrahepatic lesions under both RECIST and mRECIST criteria.

Figure 39S:Patient 39 achieved partial in intrahepatic lesions under both RECIST and mRECIST criteria.

Figure 40S:Patient 40 achieved partial in intrahepatic lesions under both RECIST and mRECIST criteria.

Figure 41S:Patient 40 achieved partial in intrahepatic lesions under both RECIST and mRECIST criteria.

Figure 42S:Patient 40 achieved partial in intrahepatic lesions under both RECIST and mRECIST criteria.

Figure 43S:Patient 43 achieved partial in intrahepatic lesions under both RECIST and mRECIST criteria.

Figure 44S:Patient 44 achieved partial in intrahepatic lesions under both RECIST and mRECIST criteria.

Figure 45S:Patient 45 achieved partial in intrahepatic lesions under both RECIST and mRECIST criteria.

Figure 46S:Patient 46 achieved partial in intrahepatic lesions under both RECIST and mRECIST criteria.

Figure 47S:Patient 47 achieved partial in intrahepatic lesions under both RECIST and mRECIST criteria.

Figure 48S:Patient 48 achieved partial in intrahepatic lesions under both RECIST and mRECIST criteria.

**Supplement 2**

**The images of 12 patients provide additional information about increased spleen volume.**

Figure 1S

Figure 2S

Figure 3S

Figure 4S

Figure 5S

Figure 6S

Figure 7S

Figure 8S

Figure 9S

Figure 10S

Figure 11S

Figure 12S
